# Supplementary material
Source: HighWire-hosted journal article supplement (https://erj.ersjournals.com/content/58/6/2102642)
Supplement: inline-supplementary-material-1 [file inline-supplementary-material-1.pdf]

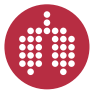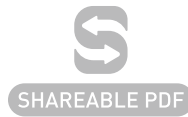

# Should diffusing capacity quality control be treated like other laboratory devices?

Jeffrey M. Haynes<sup>1</sup>, Gregg L. Ruppel <sup>2</sup> and David A. Kaminsky<sup>3</sup>

<sup>1</sup>Pulmonary Function Laboratory, Elliot Health System, Manchester, NH, USA. <sup>2</sup>Division of Pulmonary, Critical Care and Sleep Medicine, St. Louis University, St. Louis, MO, USA. <sup>3</sup>Division of Pulmonary and Critical Care Medicine, University of Vermont College of Medicine, Burlington, VT, USA.

Corresponding author: Jeffrey M. Haynes ([jhaynes@elliott-hs.org](mailto:jhaynes@elliott-hs.org))

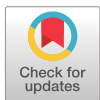

Shareable abstract (@ERSpublications)

The ERS/ATS  $D_{LCO}$  standards recommend that a weekly  $D_{LCO}$  test should be performed with a 3-L syringe and the  $V_A$  from this should be  $3\pm 0.3$  L. This report suggests that a tighter range ( $\pm 3$  sd) provides better  $D_{LCO}$  quality control than fixed arbitrary limits. <https://bit.ly/3EvkEj0>

**Cite this article as:** Haynes JM, Ruppel GL, Kaminsky DA. Should diffusing capacity quality control be treated like other laboratory devices? *Eur Respir J* 2021; 58: 2102642 [DOI: 10.1183/13993003.02642-2021].

This single-page version can be shared freely online.

Copyright ©The authors 2021.  
For reproduction rights and  
permissions contact  
[permissions@ersnet.org](mailto:permissions@ersnet.org)

Received: 5 Oct 2021  
Accepted: 20 Oct 2021

*To the Editor:*

Diffusing capacity of the lung for carbon monoxide ( $D_{LCO}$ ) is an important pulmonary function test for the diagnosis and management of obstructive, restrictive and pulmonary vascular disease. The 2017 European Respiratory Society (ERS)/American Thoracic Society (ATS) standards for single-breath carbon monoxide uptake in the lungs recommends that a weekly  $D_{LCO}$  simulation be performed with a calibrated 3-L syringe [1]. This type of simulation provides quality control values for both  $D_{LCO}$  and alveolar volume ( $V_A$ ). After accounting for system dead space, an acceptable simulated  $V_A$  is defined as  $3\pm 0.3$  L (gas conditions at atmospheric temperature, pressure, dry). We previously suggested that fixed arbitrary ranges for spirometry calibration verification were inferior to limits based on the performance of the device ( $\pm 2$  standard deviations), which is commonly used to determine quality control ranges in laboratory medicine [2]. This recommendation was included in the 2019 ATS/ERS spirometry technical standard [2, 3]. We believe that a similar recommendation is appropriate for  $V_A$  simulation.
